# Supplementary material for: A unique multi-functional cationic luminescent metal–organic nanotube for highly sensitive detection of dichromate and selective high capacity adsorption of Congo red
Source: Royal Society of Chemistry journal article supplement (doi:10.1039/c6ra03576k), 2016-01-01
Supplement: c6ra03576k1.pdf [file c6ra03576k1.pdf]

## Supporting information

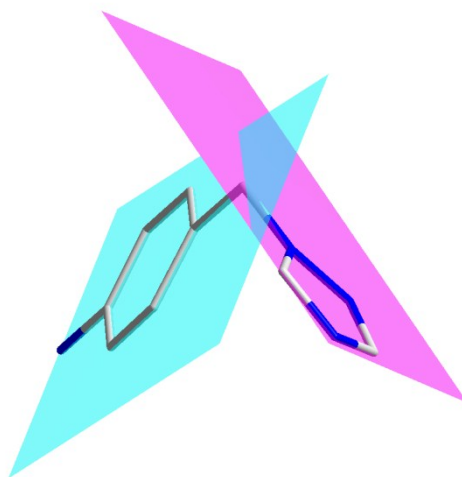

**Scheme S1.** The flexible dihedral angles between aromatic benzene and triazole of abtz .

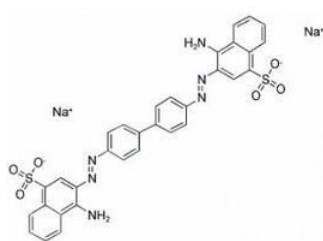

**Congo Red**

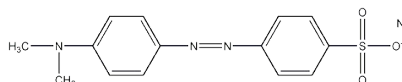

**Methyl orange**

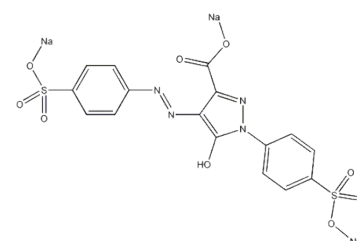

**Lemon yellow**

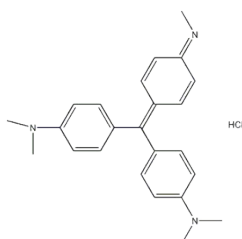

**Methyl Violet**

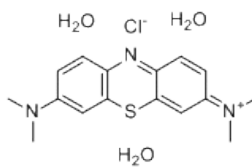

**Methylene blue**

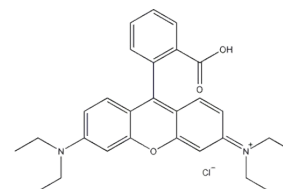

**Rhodamine B**

**Scheme S2** The structures of different dye molecules used in this work.

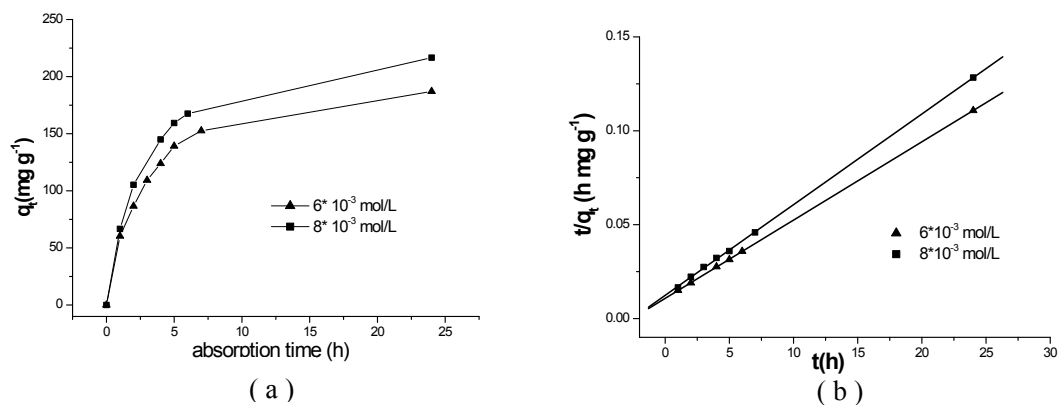

**Fig. S1** (a) Adsorption kinetic at different concentrations of  $K_2Cr_2O_7$  with **MONT-1**. (b) The secondary dynamics equation of absorption process.

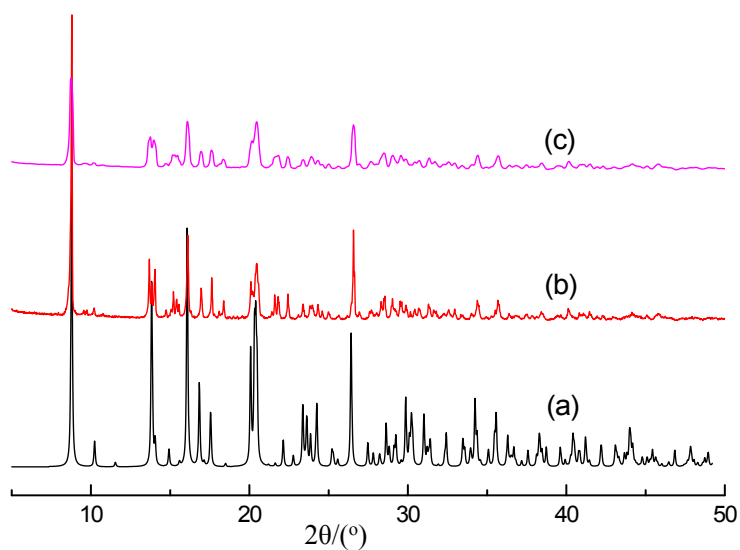

**Fig. S2** PXRD patterns for (a) as-synthesized **MONT-1** (b) the samples of **MONT-1** immersed into Congo Red ( $0.5 \text{ mg mL}^{-1}$ ) aqueous solutions for 24 h; (c) the samples of **MONT-1** immersed into Congo Red ( $1 \text{ mg mL}^{-1}$ ) aqueous solutions for 24 h.

Table S1 Comparison of monolayer maximum capacities of the adsorbents to Congo red

| MOF-type Adsorbents                                                                                     | Maximum adsorption capacity (mg g <sup>-1</sup> ) | Reference |                                                                              | Maximum adsorption capacity (mg g <sup>-1</sup> ) | Reference |
|---------------------------------------------------------------------------------------------------------|---------------------------------------------------|-----------|------------------------------------------------------------------------------|---------------------------------------------------|-----------|
| MONT-1                                                                                                  | 823.3                                             | This work | Ball-milled sugarcane bagasse                                                | 38.2                                              | 7         |
| HKUST-1                                                                                                 | 58.3                                              | 1         | Acid-activated kaolinite (AAK)/TiO <sub>2</sub>                              | 38.70                                             | 8         |
| [Zn(BDC)(TIB)]·3H <sub>2</sub> O (Zn-MOF-1)                                                             | 29.356                                            | 2         | Fe <sub>2</sub> O <sub>3</sub> -Al <sub>2</sub> O <sub>3</sub> nanocomposite | 498                                               | 9         |
| MIL-100 (Fe)                                                                                            | 714.3                                             | 3         | Polyaniline/Fe <sup>0</sup> composite nanofibers                             | 1150                                              | 10        |
| MIL-68 (In)                                                                                             | 1204                                              | 4         | CaFe <sub>2</sub> O <sub>4</sub> MNPs                                        | 40.93                                             | 11        |
| {[Cu <sub>3</sub> (btb) <sub>3</sub> (nbt) <sub>2</sub> ](H <sub>2</sub> O) <sub>2</sub> } <sub>n</sub> | 642                                               | 5         | Ag modified calcium hydroxyapatite (CaHAp)                                   | 554.54                                            | 12        |
| [Cu(bipy)(SO <sub>4</sub> ) <sub>n</sub> ]                                                              | 2429                                              | 6         | Bouquet-like calcium sulfate dehydrate (BCSD)                                | 1224.09                                           | 13        |

## References

1. Y. Xu, J. J. Jin, X. L. Li, Y. D. Han, H. Meng, T. Y. Wang and X. Zhang, *RSC Adv.*, 2015, **5**, 19199.
2. X. Q. Zhang, Y. F. Gao, H. T. Liu and Z. L. Liu, *Cryst. Eng. Comm.*, 2015, **17**, 6037.
3. S. E. Moradia, S. Dadfarniaa, A. M. Haji Shabania and S. Emamib, *Desalin. Water Treat.*, 2014, **52**, 1.
4. L. N. Jin, X. Y. Qian, J. G. Wang, H. Aslan and M. D. Dong, *J Colloid. Interf. Sci.*, 2015, **453**, 270.
5. X. X. Wang, Z. X. Li, B. Y. Yu, K. V. Hecke and G. H. Cui, *Inorg. Chem. Commun.*, 2015, **54**, 9.
6. L. Xiao, Y. Xiong, S. H. Tian, C. He, Q. X. Su and Z. H. Wen, *Chem. Eng. J.*, 2015, **265**, 157.
7. Z. Y. Zhang, L. Moghaddam, I. M. O Hara and W. O. S. Doherty, *Chem. Eng. J.*, 2011, **178**, 122.
8. Y. Hai, X. Li, H. Wu, S. Zhao, W. Deligeer and S. Asuha, *Appl. Clay. Sci.*, 2015, **114**, 558.
9. A. Mahapatra, B. G. Mishra and G. Hota, *Ceramics International.*, 2013, **39**, 5443.
10. M. Bhaumik, R. I. McCrindle and A. Maity, *Chem. Eng. J.*, 2015, **260**, 716.
11. X. Y. Liu, S. An, Y. J. Wang, Q. Yang and L. Zhang, *Chem. Eng. J.*, 2015, **262**, 517.
12. C. Srilakshmi and R. Saraf, *Micropor. Mesopor. Mat.*, 2016, **219**, 134
13. X. J. Jia, J. S. Wang, J. S. Wu, Y. C. Du, B. X. Zhao and D. den Engelsen, *RSC Adv.*, 2015, **5**, 72321.
